# Supplementary material for: Oxidation mechanism of dimethyl sulfoxide (DMSO) by OH radical in liquid phase
Source: Royal Society of Chemistry journal article supplement (doi:10.1039/b810384d), 2008-01-01
Supplement: b810384d.pdf [file b810384d.pdf]

**Supplementary Information:**

Tables of geometric parameters for all species that participate in the oxidation mechanism considering all the solvation models applied in this study. All bond distances are in Å, bond angles and dihedral angles in degrees.

**Table 1:** Geometric parameters evaluated in gas phase at the uMP2/6-311G(d,p) level. Bond distances in Å and angles in degrees.

| DMSO                                                  |        | Complex 2                                              |        |
|-------------------------------------------------------|--------|--------------------------------------------------------|--------|
| rSO <sub>(3)</sub>                                    | 1.501  | rSO <sub>(3)</sub>                                     | 1.515  |
| θC <sub>(1)</sub> SC <sub>(4)</sub>                   | 96.53  | rO <sub>(3)</sub> H <sub>(13)</sub>                    | 1.793  |
| θC <sub>(1)</sub> SO <sub>(3)</sub>                   | 106.53 | θC <sub>(1)</sub> SC <sub>(4)</sub>                    | 96.67  |
| Complex 1                                             |        | θC <sub>(1)</sub> SO <sub>(3)</sub>                    | 106.27 |
| rSO <sub>(5)</sub>                                    | 1.513  | θO <sub>(5)</sub> H <sub>(13)</sub> O <sub>(3)</sub>   | 156.53 |
| rSO <sub>(3)</sub>                                    | 1.873  | ψO <sub>(5)</sub> H <sub>(13)</sub> O <sub>(3)</sub> S | 0.06   |
| θC <sub>(1)</sub> SC <sub>(4)</sub>                   | 102.68 | MSIA                                                   |        |
| θC <sub>(1)</sub> SO <sub>(5)</sub>                   | 104.45 | rSO <sub>(3)</sub>                                     | 1.473  |
| θO <sub>(3)</sub> SO <sub>(5)</sub>                   | 154.05 | rSO <sub>(4)</sub>                                     | 1.671  |
| ψH <sub>(13)</sub> O <sub>(3)</sub> SO <sub>(5)</sub> | 23.32  | θC <sub>(1)</sub> SO <sub>(3)</sub>                    | 104.67 |
|                                                       |        | θO <sub>(3)</sub> SO <sub>(4)</sub>                    | 109.30 |
|                                                       |        | ψO <sub>(3)</sub> SO <sub>(4)</sub> H <sub>(6)</sub>   | 37.84  |

**Table 2:** Geometric parameters of the species that participate in the water-assisted mechanism in gas phase. Bond distances in Å and angles in degrees.

|                                                        | Model 1a  | Model 1b | Model 1c | Model 1d | Model 1e |
|--------------------------------------------------------|-----------|----------|----------|----------|----------|
|                                                        | DMSO      |          |          |          |          |
| rSO <sub>(3)</sub>                                     | 1.517     |          | 1.519    |          |          |
| rO <sub>(3)</sub> H <sub>(12)</sub>                    | 1.811     |          | 1.711    |          |          |
| θC <sub>(1)</sub> SC <sub>(4)</sub>                    | 96.61     |          | 96.54    |          |          |
| θC <sub>(1)</sub> SO <sub>(3)</sub>                    | 106.36    |          | 106.86   |          |          |
| θO <sub>(5)</sub> H <sub>(12)</sub> O <sub>(3)</sub>   | 156.53    |          | 171.92   |          |          |
| ψO <sub>(5)</sub> H <sub>(12)</sub> O <sub>(3)</sub> S | 0.11      |          | -34.97   |          |          |
|                                                        | Complex 1 |          |          |          |          |
| rSO <sub>(5)</sub>                                     | 1.524     | 1.506    | 1.526    | 1.504    | 1.515    |
| rSO <sub>(3)</sub>                                     | 1.857     | 1.961    | 1.866    | 2.000    | 1.932    |
| rO <sub>(3)</sub> H <sub>(14)</sub>                    | -         | 1.739    | -        | 1.657    | 1.762    |
| rO <sub>(5)</sub> H <sub>(14)</sub>                    | 1.908     | -        | 2.013    | -        | 1.964    |
| θC <sub>(1)</sub> SC <sub>(4)</sub>                    | 102.76    | 103.35   | 102.73   | 103.88   | 102.77   |
| θC <sub>(1)</sub> SO <sub>(5)</sub>                    | 104.02    | 106.03   | 104.20   | 106.90   | 105.78   |
| θO <sub>(3)</sub> SO <sub>(5)</sub>                    | 156.46    | 156.28   | 156.40   | 155.12   | 154.39   |
| ψH <sub>(13)</sub> O <sub>(3)</sub> SO <sub>(5)</sub>  | 33.19     | 34.59    | 33.05    | 1.44     | 36.16    |
|                                                        | Complex 2 |          |          |          |          |
| rSO <sub>(3)</sub>                                     | 1.527     | 1.521    | 1.530    | 1.524    | 1.529    |
| rO <sub>(3)</sub> H <sub>(13)</sub>                    | 1.836     | 1.702    | 1.773    | 1.666    | 1.740    |
| rO <sub>(5)</sub> -H <sub>(14)</sub>                   | -         | 1.951    | -        | 1.865    | 1.951    |
| rO <sub>(3)</sub> H <sub>(14)</sub>                    | 1.951     | -        | 2.810    | -        | 2.017    |
| θC <sub>(1)</sub> SC <sub>(4)</sub>                    | 96.86     | 97.22    | 97.27    | 97.22    | 97.15    |
| θC <sub>(1)</sub> SO <sub>(3)</sub>                    | 105.58    | 105.96   | 103.63   | 105.61   | 105.58   |
| ψO <sub>(5)</sub> H <sub>(13)</sub> O <sub>(3)</sub> S | 60.03     | 21.70    | 121.92   | 33.16    | 57.66    |
|                                                        | MSIA      |          |          |          |          |
| rSO <sub>(3)</sub>                                     | 1.495     | 1.495    | 1.497    | 1.497    |          |
| rSO <sub>(4)</sub>                                     | 1.642     | 1.642    | 1.627    | 1.627    |          |
| rO <sub>(3)</sub> H <sub>(10)</sub>                    | 1.891     | 1.891    |          | 1.742    |          |
| θC <sub>(1)</sub> SO <sub>(3)</sub>                    | 104.26    | 104.26   | 104.25   | 104.25   |          |
| θO <sub>(3)</sub> SO <sub>(4)</sub>                    | 109.19    | 109.20   | 110.54   | 110.54   |          |
| ψO <sub>(3)</sub> SO <sub>(4)</sub> H <sub>(6)</sub>   | 40.42     | 40.48    |          | 52.90    |          |

**Table 3:** Geometric parameters of transition structures optimized following the microsolvation schemes.

|                                                       | Model 1a | Model 1b | Model 1c | Model 1d | Model 1e |
|-------------------------------------------------------|----------|----------|----------|----------|----------|
|                                                       | TS1      |          |          |          |          |
| rSO <sub>(3)</sub>                                    | 1.744    | 1.731    |          |          | 1.99518  |
| rSC <sub>(1)</sub>                                    | 2.187    | 2.185    |          |          | 1.83187  |
| θC <sub>(1)</sub> SC <sub>(4)</sub>                   | 94.17    | 93.32    |          |          | 97.181   |
| θC <sub>(1)</sub> SO <sub>(3)</sub>                   | 152.72   | 151.40   |          |          | 136.433  |
| θC <sub>(1)</sub> SO <sub>(5)</sub>                   | 98.68    | 99.97    |          |          | 104.944  |
| ψC <sub>(1)</sub> SO <sub>(5)</sub> H <sub>(13)</sub> | 71.66    | -157.75  |          |          | -159.985 |
|                                                       | TS2      |          |          |          |          |
| rO <sub>(3)</sub> H <sub>(13)</sub>                   | 3.228    | 1.840    | 3.246    | 1.818    | 3.227    |
| rO <sub>(5)</sub> H <sub>(7)</sub>                    | 1.245    | 1.275    | 1.268    | 1.281    | 1.273    |
| θC <sub>(1)</sub> SC <sub>(4)</sub>                   | 96.82    | 96.35    | 97.94    | 96.94    | 96.62    |
| θSO <sub>(3)</sub> H <sub>(13)</sub>                  | 84.98    | 102.32   | 87.40    | 101.74   | 84.75    |
| θC <sub>(1)</sub> H <sub>(7)</sub> O <sub>(5)</sub>   | 173.86   | 154.34   | 166.07   | 155.68   | 169.99   |
| ψSO <sub>(3)</sub> H <sub>(13)</sub> O <sub>(5)</sub> | 4.14     | -10.85   | -0.79    | -17.49   | -3.91    |

**Table 4:** Geometric parameters of the liquid phase mechanism. Comparison between the two approaches analyzed in this work.

|                                                       | IEFPCM    | IEFPCM + Model 1a | IEFPCM + Model 1b |
|-------------------------------------------------------|-----------|-------------------|-------------------|
|                                                       | DMSO      |                   |                   |
| rSO <sub>(3)</sub>                                    | 1.520     | 1.531             |                   |
| θC <sub>(1)</sub> SC <sub>(4)</sub>                   | 96.62     | 97.21             |                   |
| θC <sub>(1)</sub> SO <sub>(3)</sub>                   | 106.28    | 105.90            |                   |
|                                                       | Complex 1 |                   |                   |
| rSO <sub>(5)</sub>                                    | 1.525     | 1.535             | 1.506             |
| rSO <sub>(3)</sub>                                    | 1.858     | 1.840             | 1.961             |
| θC <sub>(1)</sub> SC <sub>(4)</sub>                   | 103.59    | 103.21            | 103.35            |
| θC <sub>(1)</sub> SO <sub>(5)</sub>                   | 104.35    | 103.34            | 106.03            |
| θO <sub>(3)</sub> SO <sub>(5)</sub>                   | 156.41    | 156.01            | 156.28            |
| ψH <sub>(13)</sub> O <sub>(3)</sub> SO <sub>(5)</sub> | 46.61     | 46.80             | 34.59             |
|                                                       | Complex 2 |                   |                   |
| rSO <sub>(3)</sub>                                    | 1.530     | 1.543             | 1.521             |
| rO <sub>(3)</sub> H <sub>(13)</sub>                   | 1.712     | 1.708             | 1.702             |
| θC <sub>(1)</sub> SC <sub>(4)</sub>                   | 97.49     | 97.97             | 98.22             |
| θC <sub>(1)</sub> SO <sub>(3)</sub>                   | 106.02    | 105.10            | 104.96            |
| θO <sub>(5)</sub> H <sub>(13)</sub> O <sub>(3)</sub>  | 177.59    | 179.80            | 169.34            |

|                         |        |        |        |
|-------------------------|--------|--------|--------|
| $\psi_{O(5)H(13)O(3)S}$ | -0.22  | -71.11 | 21.71  |
|                         |        | MSIA   |        |
| $r_{SO(3)}$             | 1.488  |        | 1.501  |
| $r_{SO(4)}$             | 1.662  |        | 1.643  |
| $\theta_{C(1)SO(3)}$    | 104.87 |        | 104.52 |
| $\theta_{O(3)SO(4)}$    | 109.54 |        | 108.44 |
| $\psi_{O(3)SO(4)H(6)}$  | 51.57  |        | 42.16  |

**Table 5:** Geometric parameters optimized for the transition structures using the IEFPCM model with Bondi radii to construct the solvent cavity.

|                         | TS1    |                         | TS2    |
|-------------------------|--------|-------------------------|--------|
| $r_{SO(4)}$             | 1.731  | $r_{O(5)H(13)}$         | 1.880  |
| $r_{SC(1)}$             | 2.185  | $r_{O(5)H(7)}$          | 1.275  |
| $\theta_{C(1)SC(3)}$    | 93.32  | $\theta_{C(1)SC(3)}$    | 96.98  |
| $\theta_{C(1)SO(4)}$    | 151.40 | $\theta_{SO(4)H(13)}$   | 100.53 |
| $\theta_{C(1)SO(5)}$    | 99.97  | $\theta_{C(1)H(7)O(5)}$ | 156.40 |
| $\psi_{C(1)SO(4)H(13)}$ | 66.00  | $\psi_{SO(4)H(13)O(5)}$ | -10.46 |

**Table 5:** Geometric parameters of the transition structures using Model 3 and considering Bondi radii to construct the solvent cavity.

|                         | Model 3a |     | Model 3b |
|-------------------------|----------|-----|----------|
|                         |          | TS1 |          |
| $r_{SO(4)}$             | 1.711    |     | 1.717    |
| $r_{SC(1)}$             | 2.183    |     | 2.100    |
| $\theta_{C(1)SC(3)}$    | 93.78    |     | 82.20    |
| $\theta_{C(1)SO(4)}$    | 154.34   |     | 153.32   |
| $\theta_{C(1)SO(5)}$    | 98.07    |     | 81.38    |
| $\psi_{C(1)SO(4)H(13)}$ | 64.74    |     | -120.55  |
|                         |          | TS2 |          |
| $r_{O(5)H(13)}$         | 3.190    |     | 1.811    |
| $r_{O(5)H(7)}$          | 1.274    |     | 1.456    |
| $\theta_{C(1)SC(3)}$    | 97.41    |     | 97.20    |
| $\theta_{SO(4)H(13)}$   | 86.35    |     | 102.24   |
| $\theta_{C(1)H(7)O(5)}$ | 173.26   |     | 153.34   |
| $\psi_{SO(4)H(13)O(5)}$ | 9.170    |     | -14.23   |

Cartesian coordinates for the microsolvated molecules:

DMSO with one water molecule

|   |           |           |           |
|---|-----------|-----------|-----------|
| C | 0.577742  | 1.349626  | -0.752527 |
| S | 0.926126  | -0.003942 | 0.384784  |
| O | -0.203712 | -0.012448 | 1.397889  |
| C | 0.578376  | -1.341338 | -0.771654 |
| O | -2.320880 | 0.014098  | -0.330774 |
| H | -3.207136 | -0.100932 | 0.011964  |
| H | 0.713816  | 2.276099  | -0.192461 |
| H | -0.456865 | 1.263983  | -1.090828 |
| H | 0.721005  | -2.275834 | -0.226714 |
| H | -0.458919 | -1.251535 | -1.100420 |
| H | 1.278338  | -1.293018 | -1.609068 |
| H | -1.755384 | 0.003616  | 0.463175  |
| H | 1.282994  | 1.316653  | -1.586287 |

DMSO with two water molecules

|   |           |           |           |
|---|-----------|-----------|-----------|
| C | -0.199335 | 0.198444  | 0.120625  |
| S | -0.111802 | -0.020165 | 1.905527  |
| C | 1.644007  | 0.338115  | 2.070018  |
| O | -0.278635 | -1.505597 | 2.176221  |
| O | 1.203707  | -3.430646 | 1.033955  |
| H | 0.551620  | -4.019822 | 0.652086  |
| H | -1.202354 | -0.103590 | -0.184626 |
| H | 0.561636  | -0.417276 | -0.362874 |
| H | 1.912641  | 0.134556  | 3.107585  |
| H | 2.200568  | -0.303566 | 1.383356  |
| H | 1.813949  | 1.394111  | 1.845046  |
| H | 0.659527  | -2.778160 | 1.522900  |
| H | -0.049209 | 1.255707  | -0.112552 |
| H | 2.102700  | -2.356592 | -0.035804 |
| O | 2.495763  | -1.605696 | -0.520152 |
| H | 3.414256  | -1.858472 | -0.618372 |

Complex 1: DMSO with one water molecule

|   |           |           |           |
|---|-----------|-----------|-----------|
| C | 0.000000  | 0.000000  | 0.000000  |
| S | 0.000000  | 0.000000  | 1.790413  |
| O | 1.855491  | 0.000000  | 1.866786  |
| C | 0.039083  | 1.740696  | 2.184701  |
| O | -1.413690 | -0.431082 | 2.162108  |
| O | -2.902035 | 1.384336  | 0.665205  |
| H | -0.949637 | 0.428224  | -0.323842 |
| H | 0.861684  | 0.559472  | -0.356304 |
| H | 0.073915  | -1.041154 | -0.316606 |
| H | 0.927287  | 2.189836  | 1.746643  |
| H | -0.890434 | 2.163213  | 1.801525  |
| H | 0.078516  | 1.814441  | 3.271418  |
| H | 2.109659  | -0.908045 | 2.065487  |
| H | -2.705494 | 0.657264  | 1.273694  |
| H | -3.820346 | 1.592039  | 0.839870  |

Complex 1: OH radical with one water molecule

|   |           |           |           |
|---|-----------|-----------|-----------|
| C | -0.218157 | 1.492815  | -0.413117 |
| S | 0.758943  | 0.219842  | 0.384299  |
| O | -0.867453 | -0.592374 | 1.119992  |
| O | 2.171909  | 0.740796  | 0.407435  |
| C | 0.744703  | -1.115028 | -0.802543 |
| O | -2.572577 | -0.702265 | -0.929481 |
| H | 0.419118  | 1.956428  | -1.167687 |
| H | -1.118198 | 1.050745  | -0.836317 |
| H | -0.478823 | 2.221742  | 0.354384  |
| H | -0.284644 | -1.303306 | -1.101311 |
| H | 1.376180  | -0.801276 | -1.634802 |
| H | 1.171930  | -1.985698 | -0.306400 |
| H | -0.940236 | -0.297492 | 2.033955  |
| H | -2.144274 | -0.734953 | -0.051565 |
| H | -3.158449 | -1.459634 | -0.928648 |

Complex 1: DMSO with two water molecules

|   |           |           |           |
|---|-----------|-----------|-----------|
| C | 0.969643  | -1.391701 | -0.694305 |
| S | 1.347662  | -0.010650 | 0.380480  |
| O | 3.098097  | 0.101539  | -0.257202 |
| C | 0.948688  | 1.400787  | -0.637439 |
| O | 0.244398  | -0.039144 | 1.428174  |
| O | -1.957196 | -0.051586 | -0.378580 |
| H | -0.110080 | -1.384082 | -0.851099 |
| H | 1.536435  | -1.289714 | -1.616663 |
| H | 1.275337  | -2.295698 | -0.165877 |
| H | 1.556296  | 1.375990  | -1.538938 |
| H | -0.122186 | 1.342363  | -0.836619 |
| H | 1.187433  | 2.286495  | -0.048692 |
| H | 3.645413  | -0.315597 | 0.417129  |
| H | -1.536569 | -0.046431 | 0.489622  |
| H | -2.902348 | -0.022901 | -0.186667 |
| H | -5.235658 | -0.706440 | -0.332688 |
| O | -4.782484 | 0.035689  | 0.071876  |
| H | -5.189164 | 0.799925  | -0.340861 |

Complex 1: OH radical with two water molecules

|   |           |           |           |
|---|-----------|-----------|-----------|
| C | 0.000000  | 0.000000  | 0.000000  |
| S | 0.000000  | 0.000000  | 1.789252  |
| C | 1.734988  | 0.000000  | 2.218118  |
| O | 0.089828  | -1.997316 | 1.727958  |
| O | -0.557584 | 1.328332  | 2.222141  |
| O | 0.912251  | -3.451032 | -0.310808 |
| O | 2.936024  | -1.625883 | -0.394388 |
| H | 0.099282  | 1.040367  | -0.313165 |
| H | 0.830291  | -0.613065 | -0.345756 |
| H | -0.950797 | -0.418437 | -0.325798 |
| H | 2.271139  | -0.650273 | 1.527461  |
| H | 2.072297  | 1.035739  | 2.153980  |
| H | 1.811013  | -0.370048 | 3.239333  |
| H | -0.644606 | -2.291131 | 2.278004  |
| H | 0.525134  | -2.977887 | 0.464677  |
| H | 1.103412  | -4.326335 | 0.029721  |
| H | 2.308896  | -2.373318 | -0.434398 |
| H | 3.144315  | -1.468215 | -1.316303 |

Complex 1: DMSO with one water molecule and OH with one water molecule

|   |           |           |           |
|---|-----------|-----------|-----------|
| C | 0.019632  | -0.016058 | -0.020829 |
| S | 0.041719  | -0.005749 | 1.768555  |
| O | 1.973355  | -0.000051 | 1.818637  |
| O | -1.334588 | -0.469865 | 2.199036  |
| C | 0.108612  | 1.735185  | 2.152158  |
| O | 2.792880  | 1.819941  | 0.006856  |
| H | -0.968651 | 0.338868  | -0.316916 |
| H | 0.820624  | 0.623379  | -0.387529 |
| H | 0.173978  | -1.047845 | -0.337762 |
| H | 0.946665  | 2.166152  | 1.609023  |
| H | -0.852049 | 2.151521  | 1.846137  |
| H | 0.253634  | 1.820751  | 3.228607  |
| H | 2.253262  | -0.908831 | 1.973406  |
| H | 2.720262  | 1.117529  | 0.679206  |
| H | 3.376649  | 2.459292  | 0.416766  |
| H | -2.736327 | 0.630059  | 1.373444  |
| O | -2.880917 | 1.371874  | 0.772269  |
| H | -3.833859 | 1.447967  | 0.716087  |

Complex 2: DMSO with one water molecule

|   |           |           |           |
|---|-----------|-----------|-----------|
| C | 0.000000  | 0.000000  | 0.000000  |
| S | 0.000000  | 0.000000  | 1.799478  |
| O | 1.465166  | 0.000000  | 2.208835  |
| C | -0.569865 | 1.689129  | 2.041166  |
| O | 3.532820  | -0.545221 | 0.458455  |
| O | 2.373925  | 2.210515  | 0.680750  |
| H | 0.654048  | 0.800371  | -0.333014 |
| H | 0.384288  | -0.964059 | -0.318623 |
| H | -1.016885 | 0.128679  | -0.361883 |
| H | -0.533268 | 1.882684  | 3.108608  |
| H | 0.090732  | 2.366874  | 1.507858  |
| H | -1.594997 | 1.769791  | 1.688008  |
| H | 2.885712  | -0.518703 | 1.188425  |
| H | 2.287893  | 1.594093  | 1.415899  |
| H | 3.091193  | 1.832039  | 0.173184  |



Complex 2: OH radical with one water molecule

|   |           |           |           |
|---|-----------|-----------|-----------|
| C | 0.012126  | 0.039547  | -0.034356 |
| S | 0.046845  | -0.028593 | 1.758232  |
| O | 1.515985  | 0.015750  | 2.150207  |
| C | -0.533186 | 1.646936  | 2.059485  |
| O | 2.935587  | -2.240795 | 2.422211  |
| O | 0.712928  | -2.986636 | 0.728153  |
| H | 0.703960  | 0.820399  | -0.358105 |
| H | 0.335594  | -0.942245 | -0.378717 |
| H | -1.005827 | 0.242251  | -0.375883 |
| H | -0.520825 | 1.801179  | 3.139056  |
| H | 0.158317  | 2.342474  | 1.579662  |
| H | -1.549479 | 1.765271  | 1.676824  |
| H | 2.492939  | -1.357989 | 2.388393  |
| H | 1.528336  | -2.900955 | 1.243524  |
| H | 0.170788  | -3.548053 | 1.284246  |

Complex 2: DMSO with two water molecules

|   |             |             |             |
|---|-------------|-------------|-------------|
| C | -1.44342000 | 1.45088300  | 0.45592900  |
| S | -1.12715200 | -0.09938700 | -0.38663000 |
| O | -0.05323800 | -0.80885800 | 0.43994300  |
| C | -2.64782100 | -0.93062300 | 0.09159100  |
| O | 2.17237500  | -2.00263000 | -0.62474600 |
| O | 1.29199100  | 1.86841700  | -0.89551000 |
| H | -1.52955400 | 1.24434400  | 1.52507400  |
| H | -0.59483400 | 2.09863100  | 0.24005700  |
| H | -2.36356100 | 1.88936000  | 0.06241700  |
| H | -2.58847100 | -1.95082500 | -0.28932500 |
| H | -2.70781300 | -0.94635200 | 1.18156200  |
| H | -3.50648400 | -0.41871200 | -0.34868800 |
| H | 1.30266600  | -1.66364400 | -0.31877400 |
| H | 1.82908000  | 1.44257400  | -0.20467000 |
| H | 1.88611400  | 1.92019700  | -1.64462800 |
| H | 1.50101500  | -0.00308200 | 1.22627100  |
| O | 2.40120700  | 0.34983000  | 1.16858600  |
| H | 2.85504600  | -0.39793100 | 0.76547500  |

Complex 2: OH radical two water molecules

|   |           |           |           |
|---|-----------|-----------|-----------|
| C | -0.653103 | -1.619236 | -0.310368 |
| S | -1.152279 | -0.029852 | 0.349823  |
| C | -2.927623 | -0.275904 | 0.212922  |
| O | -0.836678 | 0.985569  | -0.742747 |
| O | 1.213339  | 2.642256  | -0.486967 |
| O | 2.046344  | 0.411655  | 1.019687  |
| H | -1.060107 | -1.704951 | -1.320640 |
| H | 0.437496  | -1.651603 | -0.334653 |
| H | -1.028776 | -2.416161 | 0.335969  |
| H | -3.407497 | 0.647026  | 0.540523  |
| H | -3.167499 | -0.465381 | -0.835252 |
| H | -3.239340 | -1.105768 | 0.851075  |
| H | 0.394133  | 2.103194  | -0.640288 |
| H | 1.900311  | 1.239047  | 0.531220  |
| H | 2.343251  | 0.694757  | 1.885362  |
| H | 2.617128  | -1.106249 | 0.144886  |
| O | 2.731624  | -1.897216 | -0.402551 |
| H | 2.894687  | -1.523546 | -1.270059 |

Complex 2: DMSO with one water molecule and OH with one water molecule

|   |           |           |           |
|---|-----------|-----------|-----------|
| C | 0.181593  | -0.163170 | -0.182167 |
| S | -0.067915 | -0.107696 | 1.598195  |
| C | 1.666387  | -0.046581 | 2.064849  |
| O | -0.547230 | -1.509131 | 1.980379  |
| O | -2.183060 | -3.019108 | 0.428242  |
| O | 1.642618  | -2.929306 | 0.731653  |
| H | 0.752843  | -1.069052 | -0.395592 |
| H | -0.805384 | -0.205431 | -0.646167 |
| H | 0.704319  | 0.737845  | -0.510310 |
| H | 1.702002  | -0.125665 | 3.152251  |
| H | 2.188431  | -0.885248 | 1.600534  |
| H | 2.079827  | 0.915076  | 1.751495  |
| H | -1.670442 | -2.485125 | 1.078446  |
| H | 0.894678  | -2.748248 | 1.315248  |
| H | 1.267878  | -3.583533 | 0.124255  |
| O | -0.071143 | -4.523759 | -0.858948 |
| H | -0.202300 | -4.399116 | -1.799544 |
| H | -0.879010 | -4.163048 | -0.467645 |

MSIA with one water molecule

|   |           |           |           |
|---|-----------|-----------|-----------|
| C | -1.005434 | 1.306890  | -0.428668 |
| S | -0.868647 | -0.409478 | 0.085411  |
| O | -0.005584 | -1.039732 | -0.960774 |
| O | 0.025227  | -0.149428 | 1.438290  |
| O | 2.154120  | 0.412199  | -0.162497 |
| H | 0.903867  | 0.169219  | 1.128228  |
| H | -1.509944 | 1.874034  | 0.354878  |
| H | 0.001020  | 1.693380  | -0.601559 |
| H | -1.583717 | 1.332295  | -1.353898 |
| H | 1.681242  | -0.214961 | -0.737735 |
| H | 3.048384  | 0.072026  | -0.104639 |

MSIA with two water molecules

|   |           |           |           |
|---|-----------|-----------|-----------|
| C | 1.366574  | 0.436690  | 1.309373  |
| S | 1.275491  | -0.386248 | -0.285256 |
| O | 0.707370  | 0.870174  | -1.149440 |
| O | 0.210930  | -1.423873 | -0.104396 |
| H | -0.130860 | 1.204606  | -0.731821 |
| H | 2.073423  | 1.264854  | 1.237386  |
| H | 0.371922  | 0.804111  | 1.567501  |
| H | 1.707955  | -0.295865 | 2.042230  |
| H | -1.498441 | -1.255467 | 0.187057  |
| O | -2.427604 | -0.953002 | 0.228836  |
| H | -2.833252 | -1.386380 | -0.524004 |
| O | -1.508010 | 1.541817  | 0.133263  |
| H | -2.030981 | 0.710789  | 0.166373  |
| H | -2.128561 | 2.232252  | -0.102958 |

TS1: DMSO with one water molecule

|   |           |           |           |
|---|-----------|-----------|-----------|
| C | 0.000000  | 0.000000  | 0.000000  |
| S | 0.000000  | 0.000000  | 2.187365  |
| C | 1.784017  | 0.000000  | 2.317530  |
| O | -0.082173 | 0.795308  | 3.737644  |
| O | -0.483656 | -1.385133 | 2.411320  |
| O | 0.983829  | -1.772920 | 4.972100  |
| H | 2.176982  | -0.617015 | 1.510357  |
| H | 2.152073  | 1.023853  | 2.243633  |
| H | 2.017785  | -0.442364 | 3.286594  |
| H | 0.487211  | -0.940287 | -0.244065 |
| H | -1.060459 | 0.023843  | -0.230248 |
| H | 0.543284  | 0.897245  | -0.285100 |
| H | -1.001339 | 1.077910  | 3.825819  |
| H | 0.436285  | -2.037395 | 4.223751  |
| H | 0.627778  | -0.897594 | 5.146907  |

TS1: DMSO with one water molecule and OH with one water molecule

|   |           |           |           |
|---|-----------|-----------|-----------|
| C | -2.718501 | 0.538378  | 0.011082  |
| S | -0.988934 | 0.062243  | -0.212230 |
| O | -0.185575 | 1.324890  | -0.036333 |
| C | -0.811122 | -0.902952 | 1.283321  |
| O | 0.028907  | -1.371219 | -1.383563 |
| O | 2.546829  | 1.495694  | -0.065045 |
| O | 2.316303  | -1.175534 | 0.347834  |
| H | -1.147488 | -0.317303 | 2.141160  |
| H | -1.389059 | -1.822185 | 1.170852  |
| H | 0.248217  | -1.149739 | 1.370755  |
| H | -2.802254 | 1.097951  | 0.945987  |
| H | -2.986202 | 1.172524  | -0.834555 |
| H | -3.338704 | -0.359440 | 0.023498  |
| H | 0.831296  | -1.316806 | -0.820086 |
| H | 1.582165  | 1.542580  | -0.192566 |
| H | 2.695146  | 2.074010  | 0.684433  |
| H | 2.568407  | -0.239007 | 0.228083  |
| H | 3.070507  | -1.667905 | 0.020196  |

TS2: DMSO with one water molecule

|   |           |           |           |
|---|-----------|-----------|-----------|
| C | 0.000000  | 0.000000  | 0.000000  |
| S | 0.000000  | 0.000000  | 1.788319  |
| O | 1.447541  | 0.000000  | 2.238790  |
| C | -0.613957 | 1.678647  | 2.002101  |
| O | 1.089122  | 2.077004  | -0.766496 |
| O | 3.236132  | 1.358499  | 0.754853  |
| H | 0.499945  | 1.032472  | -0.432670 |
| H | 0.597944  | -0.840184 | -0.353010 |
| H | -1.017523 | -0.022038 | -0.396440 |
| H | -0.595582 | 1.888485  | 3.072031  |
| H | 0.033842  | 2.361777  | 1.451689  |
| H | -1.639483 | 1.730800  | 1.628205  |
| H | 1.952762  | 1.881694  | -0.334652 |
| H | 2.688762  | 0.875572  | 1.405927  |
| H | 3.896040  | 0.716658  | 0.489334  |

TS2: OH radical with one water molecule

|   |           |           |           |
|---|-----------|-----------|-----------|
| C | 0.019880  | -0.014533 | -0.017752 |
| S | -0.020421 | -0.015495 | 1.771358  |
| C | 1.766418  | -0.009780 | 2.011010  |
| O | -0.487585 | -1.407236 | 2.150090  |
| O | 0.472846  | -2.399607 | -0.184849 |
| O | -1.873987 | -1.795291 | -1.891096 |
| H | 0.425708  | -1.130482 | -0.300001 |
| H | -0.985521 | 0.029764  | -0.433239 |
| H | 0.700761  | 0.730679  | -0.432558 |
| H | 1.940427  | -0.152758 | 3.078231  |
| H | 2.195409  | -0.840669 | 1.447370  |
| H | 2.182024  | 0.948307  | 1.690544  |
| H | 0.095367  | -2.417960 | 0.726748  |
| H | -1.539650 | -1.918521 | -2.780436 |
| H | -1.215539 | -2.256978 | -1.359041 |

TS2: DMSO with two water molecules

|   |           |           |           |
|---|-----------|-----------|-----------|
| C | 0.000000  | 0.000000  | 0.000000  |
| S | 0.000000  | 0.000000  | 1.786811  |
| C | 1.779595  | 0.000000  | 2.034985  |
| O | -0.514155 | -1.356693 | 2.236633  |
| O | 1.175843  | -1.892717 | -1.055085 |
| O | 0.351737  | -3.527031 | 0.998561  |
| O | 3.160330  | -2.876666 | 0.999431  |
| H | 0.703720  | -0.883131 | -0.450377 |
| H | -1.014609 | -0.184577 | -0.351733 |
| H | 0.404827  | 0.933106  | -0.398060 |
| H | 1.946075  | 0.067230  | 3.111037  |
| H | 2.214242  | -0.924932 | 1.647656  |
| H | 2.202312  | 0.879468  | 1.543172  |
| H | 0.747920  | -2.575501 | -0.494918 |
| H | -0.010891 | -2.797275 | 1.552182  |
| H | -0.270323 | -4.249224 | 1.096005  |
| H | 2.344137  | -3.357949 | 1.182586  |
| H | 2.970589  | -2.531847 | 0.121862  |

TS2: OH radical with two water molecules

|   |           |           |           |
|---|-----------|-----------|-----------|
| C | 0.295908  | 0.275822  | 1.269342  |
| S | 1.304902  | -0.641159 | 0.109834  |
| O | 0.584981  | -0.503073 | -1.226345 |
| C | 2.668914  | 0.532450  | 0.032782  |
| O | -0.498514 | 1.837820  | -0.433867 |
| O | -3.102735 | 0.646275  | -0.029972 |
| H | -0.099788 | 1.228183  | 0.619877  |
| H | -0.579450 | -0.323392 | 1.510652  |
| H | 0.856663  | 0.642360  | 2.130355  |
| H | 3.330346  | 0.191908  | -0.764631 |
| H | 2.268751  | 1.519426  | -0.206339 |
| H | 3.203760  | 0.537677  | 0.985274  |
| H | -0.209021 | 1.122930  | -1.052309 |
| H | -3.544567 | 1.076045  | 0.703372  |
| H | -2.346031 | 1.220809  | -0.210143 |
| H | -2.353055 | -1.120837 | 0.070254  |
| O | -1.726314 | -1.857020 | 0.109104  |
| H | -1.206798 | -1.712090 | -0.688166 |

TS2: DMSO with one water molecule and OH with one water molecule

|   |           |           |           |
|---|-----------|-----------|-----------|
| C | 0.247944  | -0.161907 | -0.198248 |
| S | -0.108504 | -0.064224 | 1.552574  |
| C | 1.599535  | 0.097023  | 2.103711  |
| O | -0.588338 | -1.426159 | 2.003140  |
| O | 1.988367  | -1.855906 | -0.688169 |
| O | 0.352699  | -3.555905 | 0.591757  |
| H | 1.173095  | -0.920548 | -0.400074 |
| H | -0.617226 | -0.563412 | -0.725517 |
| H | 0.564938  | 0.807727  | -0.589150 |
| H | 1.580408  | 0.137287  | 3.193350  |
| H | 2.168673  | -0.767805 | 1.759569  |
| H | 2.018916  | 1.022723  | 1.702335  |
| H | 1.528527  | -2.558012 | -0.154319 |
| H | -0.060135 | -2.929809 | 1.215555  |
| H | -0.266848 | -3.576733 | -0.147450 |
| H | 0.486599  | -2.475530 | -1.991861 |
| O | -0.442007 | -2.731099 | -2.061483 |
| H | -0.491627 | -3.209986 | -2.889870 |
